# Supplementary material for: Predicting plant extinction risk in a biodiversity hotspot: Environmental and anthropogenic drivers in the Western Cape, South Africa
Source: Research Square preprint supplement (doi:10.21203/rs.3.rs-6289708/v1), 2025-06-16
Supplement: Supplementary file 1 [file b96a0bad42c0b3704e6b8740.docx]

Predicting plant extinction risk in a biodiversity hotspot: Environmental and anthropogenic drivers in the Western Cape, South Africa.Biodiversity and Conservation***.*** Edith J. Singini ([singini@sun.ac.za](mailto:singini@sun.ac.za)). Department of Forestry and Wood Sciences, Stellenbosch University, Private Bag X1, Matieland 7600, South Africa

Figure S1. Bar plot showing the frequency of different invasive plant species recorded in the Western Cape from highest to lowest count.

Table S1. List of plant species with their corresponding genus and species names.

| IUCN category | Species |
| --- | --- |
| CR | *Gibbaeum hortenseae, Freylinia visseri, Selago ferruginea, Manulea minor, Polycarena silenoides, Hesperantha spicata, Hesperantha pallescens, Hesperantha kiaratayloriae, Aristea cistiflora, Wiborgiella bowieana, Wiborgiella fasciculata, Aristea pauciflora, Lobostemon belliformis, Restio acockii, Ceratocaryum pulchrum, Schoenus inconspicuus, Annesorhiza laticostata, Glia pilulosa, Bulbinella potbergensis, Bulbinella calcicola, Hessea mathewsii, Widdringtonia wallichii, Xiphotheca rosmarinifolia, Holothrix longicornu, Pterygodium bifidum, Argyrolobium crinitum, Xiphotheca phylicoides, Amphithalea ericifolia, Anisodontea dissecta, Willdenowia pilleata, Erica gracilipes, Erica chrysocodon, Erica caterviflora, Erica extrusa, Erica alexandri, Erica gerhardii, Erica viridimontana, Erica salicina, Erica perplexa, Erica remota, Erica karwyderi, Erica viscaria, Erica abietina, Erica malmesburiensis, Erica piquetbergensis, Erica cabernetea, Erica hansfordii, Erica feminarum, Erica burchelliana, Cephalophyllum parviflorum, Erica bakeri, Erica pulvinata, Erica interrupta, Oxalis natans, Oxalis levis, Isoetes stephanseniae, Stylapterus ericoides, Hermannia procumbens, Glischrocolla formosa, Erica vallis-aranearum, Erica ustulescens, Erica trichostigma, Erica xeranthemifolia, Erica bolusiae, Erica rhodopis, Erica ribisaria, Erica recurvata, Erica propendens, Erica berzelioides, Erica sociorum, Erica sacciflora, Erica physantha, Erica latiflora, Erica jasminiflora, Erica margaritacea, Erica heleogena, Erica bauera, Erica hibbertii, Cliffortia apiculata, Cliffortia ferricola, Cliffortia acockii, Euchaetis longicornis, Aspalathus crewiana, Cytinus capensis, Aspalathus subulata, Aspalathus sulphurea, Aspalathus tulbaghensis, Aspalathus repens, Aspalathus retroflexa, Aspalathus rectistyla, Aspalathus singuliflora, Aspalathus rostripetala, Aspalathus rycroftii, Aspalathus amoena, Aspalathus horizontalis, Aspalathus lenticula, Aspalathus compacta, Aspalathus complicata, Aspalathus glabrata, Muraltia ferox, Chenolea convallis, Senecio cadiscus, Cotula myriophylloides, Senecio foeniculoides, Steirodiscus linearilobus, Steirodiscus speciosus, Euryops dasyphyllus, Euryops diosmiphyllus, Zyrphelis ciliaris, Marasmodes polycephala, Marasmodes undulata, Marasmodes defoliata, Marasmodes crewiana, Marasmodes oppositifolia, Marasmodes fasciculata, Marasmodes oubinae, Marasmodes macrocephala, Syncarpha aurea, Psoralea glaucina, Marasmodes trifida, Metalasia schlechteri, Lachnaea stokoei, Metalasia distans, Adenandra odoratissima, Agathosma corymbosa, Agathosma gnidiiflora, Agathosma orbicularis, Diosma aristata, Heterorhachis hystrix, Psoralea cataracta, Cullumia floccosa, Chrysocoma esterhuyseniae, Helichrysum outeniquense, Arctotis angustifolia, Leucadendron bonum, Sorocephalus scabridus, Linconia ericoides, Sorocephalus imbricatus, Staavia zeyheri, Brunia bullata, Thesium litoreum, Skiatophytum flaccidifolium, Leucadendron immoderatum, Leucadendron comosum, Leucadendron chamelaea, Leucadendron verticillatum, Leucadendron tradouwense, Rafnia angulata, Polhillia curtisiae, Polhillia groenewaldii, Polhillia ignota, Rafnia crispa, Otholobium rubicundum, Otholobium lanceolatum, Polhillia brevicalyx, Polhillia connata, Wurmbea robusta, Lachenalia barbarae, Leucadendron levisanus, Lotononis lamprifolia, Circandra serrata, Podalyria microphylla, Leucospermum harpagonatum, Leucospermum fulgens, Leucospermum arenarium, Leucadendron globosum, Leucadendron macowanii, Leucadendron lanigerum, Leucadendron flexuosum, Leucadendron elimense, Leucospermum tottum, Protea odorata, Mimetes stokoei, Paranomus sp. nov., Protea inopina, Protea holosericea, Serruria pinnata, Serruria furcellata, Prismatocarpus lycioides, Wahlenbergia pyrophila, Wahlenbergia riversdalensis, Wahlenbergia suffruticosa, Lampranthus coccineus, Lampranthus schlechteri, Lampranthus antonii, Lampranthus rupestris, Serruria lacunosa, Serruria trilopha, Serruria scoparia, Diastella parilis, Diastella buekii, Serruria flava, Serruria aemula, Serruria florida, Ixia vinacea, Ixia campanulata, Ixia helmei, Ixia longistylis, Ixia versicolor, Ixia rouxii, Ixia bifolia, Ixia leipoldtii, Ixia reclinata, Freesia marginata, Sparaxis roxburghii, Geissorhiza malmesburiensis, Geissorhiza darlingensis, Geissorhiza sufflava, Geissorhiza helmei, Geissorhiza platystigma, Pseudalthenia aschersoniana, Oxalis fragilis, Oscularia cremnophila, Ruschia densiflora, Moraea cistiflora, Romulea malaniae, Romulea lutea, Romulea pilosa, Erepsia villiersii, Erepsia polypetala, Erepsia simulans, Erepsia dubia, Tribolium pleuropogon, Pentameris barbata, Pentameris elegans* |
| CR PE | *Globulariopsis pumila, Manulea ramulosa, Hesperantha saldanhae, Carpacoce gigantea, Schoenus riparius, Pterygodium connivens, Pterygodium newdigateae, Leobordea lanata, Erica petrusiana, Oxalis hygrophila, Oxalis variifolia, Oxalis pseudo-hirta, Oxalis perineson, Oxalis involuta, Jordaaniella anemoniflora, Erica kraussiana, Aspalathus ferox, Muraltia satureioides, Athanasia imbricata, Marasmodes reflexa, Agathosma involucrata, Agathosma rehmanniana, Agathosma pallens, Agathosma propinqua, Sorocephalus palustris, Sorocephalus crassifolius, Lebeckia zeyheri, Phylica schlechteri, Lotononis racemiflora, Afroaster bowiei, Ixia ecklonii, Lobelia barkerae, Ruschia amicorum, Erepsia promontorii, Helictotrichon quinquesetum* |
| Critically Rare | *Zaluzianskya glandulosa, Trieenea frigida, Globulariopsis obtusiloba, Selago oppositifolia, Selago esterhuyseniae, Hesperantha truncatula, Hesperantha laxifolia, Hesperantha elsiae, Hesperantha malvina, Aristea rupicola, Wiborgiella vlokii, Tritoniopsis flava, Mesembryanthemum knolfonteinense, Galium rourkei, Restio rarus, Restio rupicola, Chamarea esterhuyseniae, Centella cryptocarpa, Adenogramma natans, Heliophila cuneata, Amphithalea ericifolia, Askidiosperma delicatulum, Restio peculiaris, Leobordea laticeps, Restio implicatus, Restio montanus, Erica cincta, Erica umbratica, Erica leucotrachela, Erica annalis, Erica croceovirens, Erica kogelbergensis, Erica kammanassieae, Oxalis melanograpta, Pelargonium saxatile, Hermannia pillansii, Acmadenia baileyensis, Acmadenia tenax, Aspalathus vacciniifolia, Aspalathus pilantha, Aspalathus oliveri, Aspalathus orbiculata, Aspalathus pachyloba, Aspalathus karrooensis, Aspalathus lamarckiana, Muraltia elsieae, Muraltia bondii, Athanasia alba, Oedera epaleacea, Anaxeton angustifolium, Anaxeton lundgrenii, Pentatrichia kuntzei, Berkheya chrysanthemoides, Berkheya dregei, Hymenolepis cynopus, Metalasia humilis, Metalasia tricolor, Agathosma phillipsii, Osmitopsis pinnatifida, Calotesta alba, Mairia petiolata, Corymbium theileri, Osteospermum elsieae, Osteospermum potbergense, Thamnea matroosbergensis, Rafnia racemosa, Rafnia angulata, Anderbergia epaleata, Anderbergia fallax, Anderbergia rooibergensis, Anderbergia ustulata, Anderbergia vlokii, Vlokia ater, Vexatorella latebrosa, Roosia grahambeckii, Ixia angelae, Ixia splendida, Ixia linderi, Tritonia cedarmontana, Geissorhiza rupicola, Geissorhiza esterhuyseniae, Geissorhiza altimontana, Geissorhiza lapidosa, Geissorhiza monticola, Ruschia lavisii, Micranthus simplex, Cyphia ranunculifolia, Moraea atromontana, Erepsia insignis, Pentameris ellisii* |
| DDD | *Zaluzianskya lanigera, Nemesia fourcadei, Selago trichophylla, Dischisma fruticosum, Cynorhiza meifolia, Ficinia pygmaea, Carpha schlechteri, Isolepis pusilla, Dasispermum grandicarpum, Pelargonium aestivale, Adenogramma littoralis, Gnidia parvula, Amphithalea bullata, Disa forficaria, Anisodontea capensis, Hoodia gordonii, Erica miniscula, Oxalis stokoei, Oxalis pillansiana, Oxalis microdonta, Oxalis ioeides, Pelargonium weberi, Pelargonium flavidum, Jordaaniella maritima, Eriospermum attenuatum, Erica russakiana, Erica involvens, Ornithogalum capillifolium, Aspalathus pinguis, Aspalathus concava, Muraltia schlechteri, Muraltia aspalathoides, Muraltia stipulacea, Muraltia stokoei, Hertia cluytiifolia, Senecio euryopoides, Euryops microphyllus, Gazania lanata, Zyrphelis capensis, Oedera foveolata, Helichrysum intricatum, Pteronia utilis, Pteronia oppositifolia, Helichrysum albertense, Arctotis virgata, Lactuca dregeana, Othonna pavonia, Staavia trichotoma, Staavia pinifolia, Thesium fallax, Phylica burchellii, Phylica guthriei, Phylica glabrata, Crassula depressa, Silene mundiana, Lotononis oxyptera, Wahlenbergia neostricta, Rhinephyllum broomii, Lampranthus pakhuisensis, Lampranthus purpureus, Ixia stolonifera, Kewa arenicola, Lobelia nugax, Drosanthemum uniondalense, Drosanthemum prostratum, Drosanthemum autumnale, Stomatium difforme, Drosanthemum capillare, Ruschia holensis, Ruschia subteres, Ruschia campestris, Ruschia intermedia, Wimmerella hedyotidea, Delosperma aereum, Antimima piscodora* |
| EN | *Diascia caitliniae, Diascia ellaphieae, Manulea augei, Freylinia helmei, Freylinia longiflora, Selago neglecta, Selago pinea, Selago prostrata, Selago inaequifolia, Selago psammophila, Selago heterotricha, Manulea pillansii, Hyobanche robusta, Selago ramosissima, Polycarena nardouwensis, Polycarena subtilis, Ocotea bullata, Microdon capitatus, Freylinia vlokii, Antimima aristulata, Dischisma squarrosum, Babiana pygmaea, Babiana blanda, Babiana unguiculata, Babiana montana, Babiana leipoldtii, Babiana karooica, Babiana latifolia, Babiana nana, Hesperantha spicata, Hesperantha juncifolia, Hesperantha dolomitica, Hesperantha muirii, Klattia stokoei, Tritoniopsis lesliei, Aristea nigrescens, Aristea teretifolia, Wiborgiella dahlgrenii, Hesperantha sufflava, Tritoniopsis elongata, Tritoniopsis flexuosa, Echiostachys spicatus, Echiostachys ecklonianus, Aristea palustris, Aristea rigidifolia, Aristea lugens, Nanobubon hypogaeum, Notobubon pungens, Mesembryanthemum ladismithiense, Lobostemon hottentoticus, Mesembryanthemum suffruticosum, Cynorhiza bolusii, Mesembryanthemum napierense, Anthospermum ericifolium, Lobostemon daltonii, Lobostemon collinus, Elegia acockii, Elegia squamosa, Restio sabulosus, Hypodiscus montanus, Hypodiscus rugosus, Elegia extensa, Cannomois arenicola, Schoenus prophyllus, Schoenus quartziticus, Trianoptiles solitaria, Gnidia humilis, Gnidia insignis, Isolepis inconspicua, Ficinia latifolia, Ficinia micrantha, Ficinia dura, Restio micans, Gasteria langebergensis, Annesorhiza bracteosa, Annesorhiza radiata, Annesorhiza refracta, Annesorhiza articulata, Annesorhiza filicaulis, Dasispermum perennans, Hessea cinnamomea, Brunsvigia litoralis, Pharnaceum lanuginosum, Limeum subnudum, Adenogramma rigida, Psammotropha spicata, Tetragonia caesia, Heliophila maraisiana, Xiphotheca reflexa, Gnidia ericoides, Gnidia sonderiana, Xiphotheca guthriei, Argyrolobium pachyphyllum, Argyrolobium splendens, Argyrolobium harmsianum, Argyrolobium angustissimum, Pterygodium cruciferum, Acrolophia lunata, Amphithalea vlokii, Amphithalea cymbifolia, Pterygodium inversum, Pterygodium microglossum, Amphithalea rostrata, Disa longipetala, Anisodontea pseudocapensis, Askidiosperma rugosum, Willdenowia purpurea, Lessertia argentea, Lessertia lanata, Quaqua pulchra, Duvalia immaculata, Restio parthenocarpos, Restio pratensis, Restio harveyi, Restio anomalus, Restio femineus, Restio rigoratus, Erica filamentosa, Erica gossypioides, Erica galpinii, Erica aghillana, Erica caterviflora, Erica diotiflora, Erica dysantha, Erica elsieana, Erica cunoniensis, Erica cymosa, Erica foliacea, Erica capillaris, Erica viridiflora, Erica unicolor, Erica prolata, Erica calcicola, Erica schumannii, Erica oakesiorum, Erica platycalyx, Erica melastoma, Erica penduliflora, Erica abietina, Erica banksii, Erica hanekomii, Erica hermani, Erica innovans, Erica ecklonii, Erica orthiocola, Erica humidicola, Erica dregei, Erica venustiflora, Erica passerinoides, Erica brachysepala, Erica paucifolia, Erica agglutinans, Oxalis camelopardalis, Oxalis uliginosa, Oxalis blastorrhiza, Oxalis stictocheila, Oxalis strigosa, Glottiphyllum cruciatum, Glottiphyllum regium, Glottiphyllum carnosum, Oxalis duriuscula, Oxalis droseroides, Erica radicans, Cephalophyllum rostellum, Oxalis pallens, Oxalis minuta, Oxalis lineolata, Isoetes capensis, Eriospermum glaciale, Stylapterus fruticulosus, Stylapterus barbatus, Endonema lateriflora, Hermannia procumbens, Erica trichophylla, Erica juniperina, Erica flexistyla, Erica zebrensis, Erica riparia, Erica regia, Erica rufescens, Erica patens, Erica patersonii, Erica onusta, Erica oblongiflora, Erica oligantha, Erica pillansii, Erica accommodata, Erica lerouxiae, Erica lageniformis, Erica melanacme, Erica modesta, Erica bauera, Erica irregularis, Erica ixanthera, Erica hippurus, Limonium purpuratum, Limonium anthericoides, Liparia boucheri, Indigofera psoraloides, Indigofera quinquefolia, Indigofera thesioides, Indigofera platypoda, Indigofera mundiana, Limonium depauperatum, Cliffortia hirta, Liparia genistoides, Liparia angustifolia, Liparia striata, Cliffortia anthospermoides, Cliffortia conifera, Cliffortia curvifolia, Cliffortia burgersii, Cliffortia ericifolia, Cliffortia marginata, Euchaetis albertiniana, Macrostylis cauliflora, Macrostylis cassiopoides, Macrostylis villosa, Acmadenia candida, Aspalathus candicans, Aspalathus bowieana, Aspalathus burchelliana, Aspalathus bidouwensis, Aspalathus wurmbeana, Aspalathus attenuata, Aspalathus varians, Aspalathus tylodes, Aspalathus rosea, Aspalathus stricticlada, Aspalathus smithii, Aspalathus secunda, Aspalathus odontoloba, Aspalathus muraltioides, Aspalathus psoraleoides, Aspalathus puberula, Aspalathus joubertiana, Aspalathus isolata, Aspalathus grobleri, Aspalathus macrantha, Lotononis complanata, Lotononis comptonii, Aspalathus globulosa, Aspalathus fasciculata, Aspalathus glabrescens, Aspalathus acutiflora, Aspalathus dasyantha, Muraltia knysnaensis, Muraltia hirsuta, Muraltia gillettiae, Muraltia decipiens, Aspalathus aciloba, Muraltia minuta, Muraltia mitior, Polygala dasyphylla, Sarcocornia freitagii, Muraltia caledonensis, Muraltia barkerae, Muraltia bolusii, Oedera rotundifolia, Oedera spathulifolia, Athanasia rugulosa, Athanasia sertulifera, Athanasia capitata, Athanasia crenata, Athanasia adenantha, Cineraria angulosa, Eriocephalus microphyllus, Senecio verbascifolius, Oedera longipes, Anaxeton hirsutum, Ursinia subflosculosa, Disparago gongylodes, Steirodiscus gamolepis, Felicia westae, Felicia nigrescens, Euryops subcarnosus, Dymondia margaretae, Zyrphelis corymbosa, Marasmodes dummeri, Marasmodes oligocephala, Marasmodes spinosa, Metalasia plicata, Metalasia juniperoides, Lidbeckia pinnata, Passerina paludosa, Adenandra schlechteri, Adenandra villosa, Agathosma joubertiana, Agathosma dregeana, Agathosma elata, Agathosma conferta, Agathosma glabrata, Agathosma glandulosa, Agathosma florulenta, Agathosma sedifolia, Agathosma salina, Diosma tenella, Diosma strumosa, Diosma parvula, Agathosma minuta, Agathosma latipetala, Diosma awilana, Oncosiphon schlechteri, Diosma haelkraalensis, Diosma dichotoma, Diosma fallax, Psoralea muirii, Psoralea diturnerae, Psoralea filifolia, Psoralea peratica, Psoralea implexa, Psoralea sp. nov., Cullumia micracantha, Cullumia selago, Stoebe rugulosa, Pteronia tenuifolia, Stoebe gomphrenoides, Chrysocoma flava, Helichrysum rotundatum, Pteronia scabra, Osteospermum pterigoideum, Osteospermum australe, Athanasia cochlearifolia, Leucadendron brunioides, Leucadendron roodii, Leucadendron radiatum, Leucadendron sericeum, Sorocephalus tenuifolius, Sorocephalus teretifolius, Sorocephalus alopecurus, Sorocephalus pinifolius, Linconia alopecuroidea, Leipoldtia klaverensis, Sorocephalus clavigerus, Staavia phylicoides, Staavia verticillata, Brunia esterhuyseniae, Brunia barnardii, Aponogeton fugax, Thesium ecklonianum, Merciera tetraloba, Merciera brevifolia, Leucadendron coriaceum, Leucadendron thymifolium, Leucadendron stelligerum, Leucadendron stellare, Lebeckia plukenetiana, Lebeckia gracilis, Rafnia lancea, Rafnia angulata, Wiborgia fusca, Polhillia obsoleta, Lebeckia meyeriana, Rafnia inaequalis, Otholobium pungens, Otholobium incanum, Otholobium curtisiae, Otholobium bowieanum, Otholobium saxosum, Otholobium thomii, Phylica diosmoides, Phylica elimensis, Phylica greyii, Phylica anomala, Phylica parvula, Phylica amoena, Phylica laevis, Phylica linifolia, Phylica thunbergiana, Phylica plumosa, Phylica reversa, Cotyledon tomentosa, Silene saldanhensis, Leucadendron laxum, Leucadendron lanigerum, Lotononis densa, Lotononis elongata, Lotononis exstipulata, Lotononis filiformis, Lotononis viborgioides, Lotononis villosa, Podalyria argentea, Lotononis acocksii, Orthochilus litoralis, Lotononis gracilifolia, Stirtonanthus chrysanthus, Agapanthus walshii, Leucospermum gueinzii, Leucospermum hamatum, Leucospermum glabrum, Leucospermum formosum, Leucospermum cordatum, Leucospermum hypophyllocarpodendron, Leucadendron gydoense, Leucadendron galpinii, Leucadendron foedum, Leucadendron elimense, Leucadendron floridum, Leucadendron dregei, Leucadendron cryptocephalum, Leucadendron sp. nov., Leucadendron meyerianum, Protea venusta, Protea stokoei, Protea decurrens, Protea rupicola, Protea pudens, Protea pruinosa, Paranomus longicaulis, Paranomus adiantifolius, Protea mucronifolia, Spatalla argentea, Spatalla ericoides, Spatalla longifolia, Mimetes saxatilis, Mimetes splendidus, Mimetes argenteus, Mimetes palustris, Mimetes arboreus, Serruria roxburghii, Serruria altiscapa, Serruria millefolia, Serruria linearis, Serruria meisneriana, Serruria incrassata, Serruria heterophylla, Treichelia dodii, Wahlenbergia levynsiae, Prismatocarpus altiflorus, Prismatocarpus cliffortioides, Merciera azurea, Lampranthus glomeratus, Campylostachys helmei, Lampranthus dilutus, Lampranthus diutinus, Lampranthus debilis, Lampranthus amabilis, Lampranthus foliosus, Lampranthus sociorum, Lampranthus scaber, Lampranthus caudatus, Lampranthus tenuifolius, Lampranthus stanfordiae, Lampranthus stenus, Lampranthus pauciflorus, Lampranthus leptaleon, Serruria williamsii, Serruria zeyheri, Serruria brownii, Serruria rebeloi, Diastella proteoides, Diastella myrtifolia, Spatalla caudata, Spatalla colorata, Spatalla tulbaghensis, Spatalla salsoloides, Spatalla prolifera, Serruria foeniculacea, Serruria deluvialis, Serruria decumbens, Serruria collina, Ixia collina, Ixia aurea, Ixia tenuifolia, Ixia mostertii, Ixia pumilio, Ixia viridiflora, Ixia leucantha, Ixia fuscocitrina, Ixia sarmentosa, Codonorhiza azurea, Ixia trinervata, Ixia acaulis, Ixia curta, Aloiampelos juddii, Thereianthus bulbiferus, Thereianthus elandsmontanus, Ezoloba macrocarpa, Kewa trachysperma, Ixia monadelpha, Ixia longituba, Ixia gloriosa, Ixia atrandra, Ixia erubescens, Freesia fucata, Sparaxis fragrans, Sparaxis auriculata, Sparaxis maculosa, Geissorhiza setacea, Sparaxis grandiflora, Tritonia lancea, Geissorhiza purpurascens, Geissorhiza pusilla, Geissorhiza barkerae, Geissorhiza furva, Geissorhiza geminata, Geissorhiza eurystigma, Geissorhiza mathewsii, Geissorhiza louisabolusiae, Geissorhiza brehmii, Geissorhiza erosa, Geissorhiza melanthera, Geissorhiza tricolor, Geissorhiza exilis, Drosanthemum micans, Oxalis falcatula, Monopsis variifolia, Drosanthemum thudichumii, Drosanthemum tuberculiferum, Drosanthemum worcesterense, Drosanthemum zygophylloides, Trichodiadema pygmaeum, Ruschia cupulata, Drosanthemum flavum, Drosanthemum hallii, Drosanthemum bellum, Drosanthemum quadratum, Pauridia canaliculata, Empodium veratrifolium, Ruschia schollii, Ruschia tecta, Ruschia leptocalyx, Ferraria parva, Pauridia pygmaea, Pauridia maximiliani, Drosanthemum lavisii, Pauridia longituba, Romulea barkerae, Romulea maculata, Romulea saldanhensis, Romulea sinispinosensis, Romulea eximia, Romulea aquatica, Romulea elliptica, Erepsia steytlerae, Erepsia polita, Erepsia dunensis, Erepsia brevipetala, Cleretum clavatum, Roodebergia kitamurana, Geissorhiza tulbaghensis, Dicrocaulon humile, Delosperma calitzdorpense, Delosperma guthriei, Erepsia hallii, Tulista kingiana, Acrodon subulatus, Acrodon quarcicola, Acrodon purpureostylus, Acrodon parvifolius, Pentameris pholiuroides, Pentameris scandens, Zeuktophyllum suppositum, Bijlia dilatata, Pentameris ecklonii, Pentameris bachmannii* |
| EN* | *Zostera capensis* |
| EW | *Erica turgida, Erica verticillata* |
| NT | *Carpobrotus muirii, Nemesia strumosa, Diascia pusilla, Zaluzianskya parviflora, Jamesbrittenia calciphila, Manulea altissima, Polycarena capensis, Babiana villosula, Babiana brachystachys, Babiana nervosa, Babiana angustifolia, Babiana villosa, Babiana tubulosa, Babiana melanops, Babiana confusa, Babiana fragrans, Babiana nana, Hesperantha radiata, Hesperantha spicata, Hesperantha pilosa, Hesperantha erecta, Aristea cantharophila, Aristea inaequalis, Aristea simplex, Wiborgiella sessilifolia, Calobota lotononoides, Notobubon striatum, Aristea oligocephala, Aristea recisa, Elegia recta, Hypodiscus procurrens, Thamnochortus paniculatus, Thamnochortus fraternus, Trianoptiles capensis, Ficinia limosa, Ficinia overbergensis, Aloe framesii, Lessertia tomentosa, Haworthia blackburniae, Glia decidua, Centella calcaria, Centella capensis, Aloe arenicola, Aloe micracantha, Capnophyllum africanum, Arctopus dregei, Gethyllis ciliaris, Crinum campanulatum, Galenia glandulifera, Gnidia penicillata, Gnidia chrysophylla, Disperis cucullata, Holothrix pilosa, Amphithalea alba, Disa ovalifolia, Angraecum conchiferum, Amphithalea tomentosa, Amphithalea villosa, Amphithalea axillaris, Disa atrorubens, Disa flexuosa, Disa purpurascens, Askidiosperma andreaeanum, Hoodia pilifera, Erica ferrea, Erica flocciflora, Erica clavisepala, Erica capitata, Erica macowanii, Erica filipendula, Erica plukenetii, Oxalis comptonii, Oxalis senecta, Glottiphyllum suave, Cephalophyllum diversiphyllum, Oxalis disticha, Erica dispar, Oxalis pendulifolia, Pelargonium fasciculaceum, Pelargonium ternifolium, Eriospermum lanuginosum, Curtisia dentata, Pelargonium divisifolium, Erica petricola, Erica arenaria, Liparia congesta, Indigofera tomentosa, Indigofera hispida, Limonium capense, Limonium linifolium, Cliffortia schlechteri, Acmadenia tetragona, Acmadenia argillophila, Aspalathus batodes, Albuca echinosperma, Aspalathus ternata, Aspalathus salteri, Aspalathus sanguinea, Aspalathus pendula, Aspalathus incompta, Aspalathus linearifolia, Aspalathus cordicarpa, Muraltia trinervia, Muraltia thunbergii, Muraltia pappeana, Muraltia arachnoidea, Muraltia concava, Muraltia splendens, Oedera tricephala, Oedera fruticosa, Cotula filifolia, Senecio pillansii, Oedera viscosa, Oedera multipunctata, Ursinia filipes, Euryops linearis, Felicia nordenstamii, Metalasia pulchella, Lachnaea densiflora, Lachnaea axillaris, Lachnaea pudens, Metalasia erectifolia, Metalasia adunca, Metalasia calcicola, Lachnaea filicaulis, Passerina ericoides, Lachnaea funicaulis, Passerina filiformis, Adenandra rotundifolia, Adenandra villosa, Agathosma adenandriflora, Agathosma collina, Agathosma hispida, Agathosma foetidissima, Agathosma geniculata, Agathosma scaberula, Diosma aspalathoides, Diosma pedicellata, Agathosma marifolia, Agathosma microcalyx, Phymaspermum leptophyllum, Cullumia carlinoides, Diosma guthriei, Psoralea repens, Psoralea odoratissima, Lachnospermum neglectum, Gorteria personata, Gnaphalium declinatum, Helichrysum tricostatum, Helichrysum cochleariforme, Osteospermum aciphyllum, Othonna intermedia, Othonna petiolaris, Leucadendron sessile, Leucadendron sorocephalodes, Leucadendron sheilae, Leucadendron pubibracteolatum, Amphibolia laevis, Brunia laevis, Aponogeton angustifolius, Asparagus lignosus, Merwilla plumbea, Asparagus stipulaceus, Leucadendron loranthifolium, Merciera leptoloba, Leucadendron coniferum, Leucadendron conicum, Leucadendron uliginosum, Leucadendron strobilinum, Leucadendron spissifolium, Cyclopia intermedia, Cyclopia maculata, Cyclopia subternata, Cyclopia genistoides, Cyclopia sessiliflora, Rafnia diffusa, Otholobium swartbergense, Otholobium bolusii, Otholobium uncinatum, Phylica velutina, Phylica gracilis, Phylica nigrita, Triglochin bulbosa, Silene rigens, Silene burchellii, Herniaria pearsonii, Lachenalia marginata, Lachenalia quadricolor, Lachenalia ameliae, Lachenalia whitehillensis, Lachenalia barkeriana, Massonia setulosa, Lachenalia contaminata, Lachenalia nardousbergensis, Leucadendron linifolium, Lotononis prostrata, Euphorbia nesemannii, Crossyne flava, Stirtonanthus insignis, Podalyria lanceolata, Leucospermum gracile, Leucospermum cordifolium, Leucospermum conocarpodendron, Leucospermum pedunculatum, Leucospermum patersonii, Leucospermum pluridens, Leucospermum oleifolium, Leucospermum lineare, Leucospermum reflexum, Leucadendron meridianum, Leucadendron dubium, Leucadendron daphnoides, Leucadendron corymbosum, Leucadendron muirii, Leucadendron modestum, Protea susannae, Protea acaulos, Protea effusa, Protea cordata, Leucospermum truncatulum, Leucospermum tottum, Leucospermum tomentosum, Leucospermum secundifolium, Leucospermum rodolentum, Leucospermum prostratum, Leucospermum praemorsum, Protea recondita, Protea pityphylla, Leucospermum truncatum, Leucospermum winteri, Paranomus bracteolaris, Paranomus bolusii, Paranomus tomentosus, Paranomus lagopus, Paranomus abrotanifolius, Protea obtusifolia, Paranomus esterhuyseniae, Spatalla curvifolia, Mimetes pauciflorus, Protea lepidocarpodendron, Protea grandiceps, Protea lorea, Protea longifolia, Serruria nervosa, Serruria rosea, Serruria leipoldtii, Serruria inconspicua, Serruria gremialis, Serruria fucifolia, Wahlenbergia asparagoides, Lampranthus glaucus, Wahlenbergia longifolia, Lampranthus explanatus, Lampranthus densifolius, Lampranthus reptans, Serruria bolusii, Serruria adscendens, Diastella thymelaeoides, Spatalla racemosa, Spatalla setacea, Spatalla squamata, Spatalla parilis, Spatalla barbigera, Serruria elongata, Serruria effusa, Serruria decipiens, Ixia capillaris, Ixia maculata, Ixia micrandra, Ixia stricta, Ixia scillaris, Ixia metelerkampiae, Ixia contorta, Ixia ramulosa, Syringodea longituba, Tritonia pallida, Tritonia flabellifolia, Tritonia squalida, Freesia caryophyllacea, Freesia viridis, Freesia leichtlinii, Sparaxis galeata, Sparaxis metelerkampiae, Sparaxis elegans, Sparaxis grandiflora, Geissorhiza outeniquensis, Geissorhiza nana, Geissorhiza radians, Geissorhiza purpureolutea, Geissorhiza imbricata, Geissorhiza foliosa, Geissorhiza exscapa, Geissorhiza lewisiae, Geissorhiza lithicola, Geissorhiza karooica, Cyphia incisa, Cyphia phyteuma, Cyphia crenata, Drosanthemum oculatum, Drosanthemum crassum, Pauridia alticola, Ruschia indecora, Lapeirousia fastigiata, Ferraria foliosa, Micranthus cruciatus, Pauridia minuta, Dioscorea mundii, Moraea maximiliani, Moraea fergusoniae, Moraea elsiae, Watsonia hysterantha, Watsonia aletroides, Moraea australis, Moraea tripetala, Bobartia fasciculata, Bobartia longicyma, Gladiolus meliusculus, Gladiolus watsonius, Gladiolus caeruleus, Erepsia pentagona, Geissorhiza tenella, Brianhuntleya intrusa* |
| Rare | *Alonsoa peduncularis, Nemesia picta, Halleria ovata, Charadrophila capensis, Zaluzianskya acrobareia, Zaluzianskya isanthera, Zaluzianskya mirabilis, Nemesia acornis, Trieenea laxiflora, Trieenea longipedicellata, Trieenea schlechteri, Trieenea taylorii, Harveya roseoalba, Harveya purpurea, Chenopodiopsis chenopodioides, Pseudoselago peninsulae, Pseudoselago prolixa, Pseudoselago prostrata, Pseudoselago quadrangularis, Pseudoselago caerulescens, Pseudoselago diplotricha, Trieenea elsiae, Trieenea occulta, Trieenea lanciloba, Trieenea lasiocephala, Globulariopsis wittebergensis, Cromidon gracile, Selago albomontana, Selago dregeana, Selago dolichonema, Selago nigromontana, Selago cedrimontana, Selago comptonii, Selago exigua, Selago rubromontana, Selago thermalis, Selago valliscitri, Manulea montana, Manulea ovatifolia, Manulea paucibarbata, Manulea juncea, Phyllopodium viscidissimum, Phyllopodium caespitosum, Oftia glabra, Chaenostoma longipedicellatum, Polycarena exigua, Phyllopodium alpinum, Microdon nitidus, Antimima biformis, Babiana geniculata, Babiana cinnamomea, Hesperantha quadrangula, Hesperantha flava, Hesperantha montigena, Hesperantha namaquana, Hesperantha lithicola, Braunsia stayneri, Tritoniopsis latifolia, Tritoniopsis williamsiana, Aristea singularis, Hesperantha decipiens, Hesperantha helmei, Tritoniopsis toximontana, Mesembryanthemum viridiflorum, Bolandia argillacea, Mesembryanthemum chrysophthalmum, Mesembryanthemum amabile, Carpacoce scabra, Anthospermum esterhuysenianum, Galium subvillosum, Lobostemon muirii, Anthochortus graminifolius, Rhodocoma vleibergensis, Ceratocaryum fistulosum, Anthochortus capensis, Restio pumilis, Ceratocaryum persistens, Thamnochortus kammanassiae, Thamnochortus levynsiae, Thamnochortus amoena, Elegia amoena, Staberoha stokoei, Platycaulos subcompressus, Cannomois aristata, Ficinia anysbergensis, Ficinia cedarbergensis, Stapeliopsis stayneri, Eumorphia corymbosa, Ficinia minutiflora, Ficinia petrophila, Ficinia grandiflora, Ficinia anceps, Gasteria vlokii, Lichtensteinia globosa, Lichtensteinia crassijuga, Annesorhiza burttii, Annesorhiza asparagoides, Anginon ternatum, Strumaria watermeyeri, Cyrtanthus debilis, Strumaria karooica, Centella ternata, Centella umbellata, Centella longifolia, Centella dolichocarpa, Centella pilosa, Hermas proterantha, Gethyllis lata, Hessea pulcherrima, Apodolirion cedarbergense, Pelargonium alternans, Pelargonium citronellum, Grubbia rourkei, Acrosanthes parviflora, Pharnaceum rubens, Heliophila cedarbergensis, Heliophila pusilla, Heliophila rimicola, Heliophila tricuspidata, Heliophila monosperma, Heliophila polygaloides, Evotella rubiginosa, Argyrolobium rarum, Disperis bolusiana, Argyrolobium aciculare, Amphithalea concava, Satyrium situsanguinum, Pachites bodkinii, Pachites appressa, Amphithalea oppositifolia, Amphithalea imbricata, Amphithalea ericifolia, Disa aurata, Disa tenella, Disa esterhuyseniae, Disa pygmaea, Anisodontea procumbens, Anisodontea malvastroides, Askidiosperma alticolum, Disa schizodioides, Leobordea esterhuyseana, Cephalaria decurrens, Xysmalobium fluviale, Tridentea virescens, Restio esterhuyseniae, Restio affinis, Restio elsieae, Restio distans, Restio saxatilis, Restio wittebergensis, Restio karooicus, Restio nodosus, Restio uniflorus, Restio fuscidulus, Restio fusiformis, Restio alticola, Restio paludicola, Restio brunneus, Restio subtilis, Restio setiger, Restio singularis, Restio longiaristatus, Restio durus, Restio clandestinus, Restio monostylis, Restio levynsiae, Erica amicorum, Erica gigantea, Erica constantia, Erica costatisepala, Erica depressa, Erica cymosa, Erica lithophila, Erica conspicua, Erica pillansii, Erica boucheri, Erica jonasiana, Erica intermedia, Erica jugicola, Erica ceraria, Erica chionodes, Erica dolfiana, Erica blaerioides, Erica richardii, Erica limnophila, Erica ioniana, Erica abietina, Erica sperata, Erica rusticula, Erica hottentotica, Erica roseoloba, Erica hebdomadalis, Erica cubitans, Erica brevicaulis, Erica chiroptera, Erica hexensis, Erica atromontana, Erica inflaticalyx, Erica cereris, Erica vallis-fluminis, Oxalis cathara, Oxalis stenoptera, Oxalis tenuipes, Oxalis tenuis, Oxalis purpurata, Oxalis reflexa, Oxalis salteri, Oxalis stellata, Cephalophyllum staminodiosum, Oxalis phloxidiflora, Oxalis oculifera, Oxalis oligophylla, Oxalis attaquana, Hermannia disticha, Chironia stokoei, Pelargonium denticulatum, Brachysiphon rupestris, Brachysiphon microphyllus, Stylapterus ericifolius, Brachysiphon fucatus, Sonderothamnus petraeus, Sonderothamnus speciosus, Hermannia micrantha, Erica valida, Erica thomae, Erica zwartbergensis, Erica quadrisulcata, Erica pyxidiflora, Erica tenuipes, Erica setulosa, Erica barrydalensis, Erica pannosa, Erica omninoglabra, Erica oophylla, Erica pageana, Erica nevillei, Erica astroites, Erica pilaarkopensis, Erica plena, Erica physophylla, Erica philippioides, Erica lowryensis, Erica macrophylla, Erica lignosa, Erica langebergensis, Erica leucosiphon, Erica keeromsbergensis, Erica mitchellensis, Erica marlothii, Erica haematocodon, Erica halicacaba, Erica inordinata, Erica insignis, Erica ingeana, Erica inclusa, Limonium teretifolium, Liparia capitata, Liparia confusa, Indigofera superba, Indigofera filiformis, Cliffortia heterophylla, Liparia calycina, Liparia racemosa, Cliffortia crassinervis, Cliffortia weimarckii, Cliffortia glauca, Cliffortia esterhuyseniae, Cliffortia grandifolia, Cliffortia setifolia, Cliffortia ovalis, Cliffortia montana, Cliffortia oligodonta, Cliffortia prionota, Cliffortia carinata, Cliffortia verrucosa, Cliffortia aculeata, Crotalaria lebeckioides, Indigofera fulcrata, Indigofera candolleana, Empleurum fragrans, Cliffortia lanceolata, Coleonema virgatum, Euchaetis glabra, Acmadenia bodkinii, Acmadenia burchellii, Acmadenia tetracarpellata, Acmadenia mundiana, Acmadenia rourkeana, Macrostylis barbigera, Sheilanthera pubens, Adenandra villosa, Acmadenia matroosbergensis, Aspalathus capensis, Aspalathus caespitosa, Aspalathus theresae, Ornithogalum esterhuyseniae, Aspalathus suaveolens, Aspalathus venosa, Aspalathus verbasciformis, Aspalathus ulicina, Aspalathus truncata, Aspalathus tridentata, Aspalathus ramosissima, Aspalathus stokoei, Aspalathus shawii, Aspalathus rostrata, Aspalathus salicifolia, Aspalathus patens, Aspalathus keeromsbergensis, Aspalathus incana, Aspalathus incurva, Aspalathus inops, Aspalathus intricata, Aspalathus humilis, Aspalathus monosperma, Aspalathus leptocoma, Aspalathus comptonii, Aspalathus condensata, Aspalathus congesta, Aspalathus chenopoda, Aspalathus empetrifolia, Aspalathus decora, Muraltia langebergensis, Muraltia alba, Muraltia curvipetala, Muraltia diabolica, Polygala langebergensis, Muraltia montana, Muraltia aspalatha, Muraltia paludosa, Salsola ceresica, Muraltia occidentalis, Muraltia acipetala, Muraltia carnosa, Hippia trilobata, Hippia simplicior, Athanasia oocephala, Athanasia calophylla, Athanasia hirsuta, Athanasia humilis, Athanasia leptocephala, Hippia hutchinsonii, Senecio esterhuyseniae, Cineraria lobata, Cineraria alchemilloides, Eriocephalus tenuipes, Eriocephalus grandiflorus, Cotula andreae, Senecio speciosissimus, Senecio umbricola, Senecio muirii, Oedera decussata, Oedera resinifera, Cotula sericea, Thaminophyllum latifolium, Thaminophyllum multiflorum, Ursinia oreogena, Ursinia pygmaea, Anaxeton ellipticum, Ursinia coronopifolia, Ursinia hispida, Ursinia merxmuelleri, Senecio albifolius, Haplocarpha oocephala, Pentatrichia integra, Felicia oleosa, Felicia serrata, Felicia comptonii, Felicia cymbalarioides, Felicia diffusa, Euryops marlothii, Berkheya francisci, Berkheya viscosa, Berkheya jardineana, Zyrphelis glabra, Zyrphelis gracilis, Zyrphelis levis, Felicia esterhuyseniae, Felicia microcephala, Zyrphelis ecklonis, Zyrphelis decumbens, Syncarpha zeyheri, Syncarpha dykei, Oligothrix gracilis, Agathosma tulbaghensis, Agathosma umbonata, Polyarrhena prostrata, Metalasia phillipsii, Metalasia montana, Metalasia lichtensteinii, Metalasia albescens, Syncarpha marlothii, Syncarpha montana, Metalasia tristis, Metalasia helmei, Lachnaea pedicellata, Lachnaea alpina, Lachnaea marlothii, Lachnaea striata, Passerina esterhuyseniae, Adenandra marginata, Adenandra dahlgrenii, Agathosma esterhuyseniae, Agathosma decurrens, Agathosma dentata, Agathosma concava, Agathosma cordifolia, Agathosma insignis, Agathosma hirsuta, Agathosma aemula, Agathosma foleyana, Agathosma pubigera, Agathosma bathii, Agathosma stenosepala, Agathosma stokoei, Agathosma subteretifolia, Agathosma sladeniana, Agathosma spinosa, Agathosma alligans, Agathosma linifolia, Agathosma longicornu, Agathosma krakadouwensis, Osmitopsis pinnatifida, Osmitopsis tenuis, Osmitopsis dentata, Oncosiphon intermedium, Hydroidea elsiae, Dimorphotheca venusta, Osmitopsis parvifolia, Osmitopsis glabra, Osmitopsis nana, Psoralea elegans, Leucoptera subcarnosa, Cullumia rigida, Vellereophyton felinum, Troglophyton elsiae, Psoralea tenuissima, Psoralea trullata, Psoralea karooensis, Stoebe rosea, Stoebe montana, Chrysocoma acicularis, Mairia purpurata, Phaneroglossa bolusii, Lamprocephalus montanus, Leucoptera oppositifolia, Helichrysum saxicola, Helichrysum fruticans, Helichrysum marifolium, Corymbium laxum, Corymbium elsiae, Osteospermum burttianum, Osteospermum norlindhianum, Gerbera wrightii, Thamnea hirtella, Staavia dodii, Berzelia galpinii, Berzelia dregeana, Berzelia ecklonii, Brunia powrieae, Brunia schlechteri, Brunia oblongifolia, Staavia glutinosa, Brunia compacta, Brunia purpurea, Thesium susannae, Audouinia capitata, Prismatocarpus cordifolius, Leucadendron cordatum, Leucadendron cadens, Cyclopia galioides, Lebeckia uniflora, Cyclopia glabra, Rafnia capensis, Lebeckia grandiflora, Rafnia rostrata, Otholobium racemosum, Otholobium heterosepalum, Otholobium macradenium, Otholobium fruticans, Phylica keetii, Phylica chionocephala, Phylica chionophila, Phylica comptonii, Phylica variabilis, Phylica virgata, Chlorophytum pauciphyllum, Cyanella alba, Caesia capensis, Phylica floccosa, Phylica alticola, Phylica nodosa, Phylica obtusifolia, Phylica piquetbergensis, Phylica mairei, Phylica maximiliani, Phylica nigromontana, Phylica altigena, Phylica intrusa, Phylica trachyphylla, Phylica stokoei, Phylica retorta, Phylica sericea, Crassula peculiaris, Crassula rupestris, Cotyledon eliseae, Crassula lasiantha, Massonia triflora, Drimia sigmoidea, Kogelbergia phylicoides, Lotononis azureoides, Lotononis purpurescens, Anderbergia elsiae, Hyaenanche globosa, Vlokia montana, Leucospermum erubescens, Faurea macnaughtonii, Mimetes fimbriifolius, Serruria reflexa, Serruria glomerata, Roella recurvata, Wahlenbergia adamsonii, Wahlenbergia brachyphylla, Prismatocarpus implicatus, Prismatocarpus lasiophyllus, Prismatocarpus lycopodioides, Prismatocarpus spinosus, Apodytes geldenhuysii, Capelio caledonica, Colchicum karooparkense, Stilbe gymnopharyngia, Lampranthus profundus, Lampranthus promontorii, Ophioglossum bergianum, Serruria villosa, Esterhuysenia alpina, Esterhuysenia inclaudens, Diastella fraterna, Serruria confragosa, Gladiolus monticola, Ixia alticola, Ixia roseoalba, Ixia stohriae, Thereianthus ixioides, Thereianthus longicollis, Thereianthus racemosus, Ixia fucata, Ixia monticola, Ixia saundersiana, Ixia altissima, Ixia scillaris, Ixia flagellaris, Ixia esterhuyseniae, Ixia bellendenii, Freesia sparrmannii, Capeochloa setacea, Tritonia florentiae, Geissorhiza bonaspei, Geissorhiza nigromontana, Geissorhiza nubigena, Geissorhiza scopulosa, Geissorhiza minuta, Geissorhiza intermedia, Geissorhiza leipoldtii, Geissorhiza unifolia, Geissorhiza uliginosa, Geissorhiza bryicola, Braunsia vanrensburgii, Geissorhiza alticola, Geissorhiza elsiae, Geissorhiza erubescens, Geissorhiza cataractarum, Geissorhiza cedarmontana, Geissorhiza ciliatula, Geissorhiza callista, Geissorhiza reclinata, Geissorhiza saxicola, Lobelia eurypoda, Lobelia comptonii, Lobelia dasyphylla, Lobelia eckloniana, Lobelia muscoides, Drosanthemum ramosissimum, Oxalis fourcadei, Drosera regia, Lobelia hypsibata, Ruschia ceresiana, Ruschia altigena, Drosanthemum chrysum, Ruschia lapidicola, Ruschia nieuwerustensis, Ruschia promontorii, Ferraria ovata, Ferraria ornata, Nivenia stokoei, Nivenia parviflora, Pauridia breviscapa, Pauridia pusilla, Drosanthemum leptum, Moraea fenestralis, Moraea monticola, Moraea verecunda, Romulea vinacea, Romulea viridibracteata, Bobartia paniculata, Bobartia gladiata, Bobartia lilacina, Bobartia orientalis, Moraea rivulicola, Romulea cedarbergensis, Gladiolus pappei, Gladiolus crispulatus, Gladiolus delpierrei, Nenax velutina, Nenax elsieae, Phiambolia hallii, Phiambolia franciscii, Phiambolia incumbens, Wimmerella frontidentata, Erepsia forficata, Geissorhiza stenosiphon, Geissorhiza tabularis, Nivenia fruticosa, Nivenia levynsiae, Nivenia stenosiphon, Argyroderma subalbum, Ehrharta setacea, Antimima fergusoniae, Antimima lokenbergensis, Antimima nordenstamii, Antimima condensa, Pentameris hirtiglumis, Pentameris caulescens, Pentameris clavata, Pentameris longiglumis, Pentameris holciformis, Pentameris horrida, Pentameris glacialis, Pentameris swartbergensis, Pentameris uniflora* |
| VU | *Gibbaeum hartmannianum, Diascia appendiculata, Nemesia elata, Diascia collina, Manulea cinerea, Manulea corymbosa, Chenopodiopsis retrorsa, Selago cryptadenia, Selago diffusa, Selago glandulosa, Hebenstretia dregei, Selago villicaulis, Selago rotundifolia, Manulea derustiana, Manulea exigua, Selago burchellii, Lyperia formosa, Octopoma nanum, Chaenostoma multiramosum, Chaenostoma titanophilum, Phyllopodium dolomiticum, Phyllopodium mimetes, Dischisma crassum, Octopoma quadrisepalum, Octopoma octojuge, Babiana purpurea, Babiana pauciflora, Babiana lineolata, Babiana minuta, Babiana virescens, Babiana fimbriata, Hesperantha brevifolia, Hesperantha fibrosa, Klattia flava, Tritoniopsis bicolor, Aristea fimbriata, Aristea biflora, Aristea zeyheri, Calobota elongata, Wiborgiella humilis, Chasmanthe bicolor, Tritoniopsis caledonensis, Echiostachys incanus, Mesembryanthemum expansum, Mesembryanthemum varians, Mesembryanthemum lilliputanum, Mesembryanthemum caudatum, Mesembryanthemum tenuiflorum, Galium bredasdorpense, Mesembryanthemum glareicola, Nenax hirta, Lobostemon capitatus, Lobostemon regulariflorus, Lobostemon sanguineus, Lobostemon lucidus, Anthochortus insignis, Anthochortus singularis, Elegia verreauxii, Hypodiscus squamosus, Hypodiscus sulcatus, Hypodiscus alternans, Thamnochortus pellucidus, Thamnochortus pluristachyus, Thamnochortus muirii, Thamnochortus nutans, Thamnochortus papyraceus, Thamnochortus dumosus, Thamnochortus ellipticus, Thamnochortus karooica, Ficinia pinguior, Ficinia rigida, Elegia fucata, Elegia prominens, Elegia fenestrata, Staberoha multispicula, Platycaulos acutus, Elegia altigena, Cannomois anfracta, Schoenus graminifolius, Schoenus calceolus, Ficinia quartzicola, Isolepis venustula, Isolepis leucoloma, Ficinia echinata, Ficinia distans, Ficinia elatior, Ficinia fastigiata, Astroloba rubriflora, Astroloba herrei, Stapeliopsis breviloba, Gasteria carinata, Annesorhiza calcicola, Annesorhiza elsiae, Anginon pumilum, Anginon tenuior, Centella thesioides, Bulbinella latifolia, Centella caespitosa, Hermas lanata, Centella pottebergensis, Centella rupestris, Capnophyllum lutzeyeri, Capnophyllum macrocarpum, Clivia miniata, Hessea undosa, Hessea tenuipedicellata, Wachendorfia brachyandra, Boophone haemanthoides, Pelargonium curviandrum, Adenogramma teretifolia, Grubbia rosmarinifolia, Psammotropha diffusa, Tetragonia pillansii, Tetragonia sphaerocarpa, Galenia crystallina, Heliophila cinerea, Heliophila elata, Heliophila tabularis, Heliophila linearis, Heliophila promontorii, Gnidia spicata, Lepidium pinnatum, Lasiosiphon pedunculatus, Gnidia ornata, Heliophila ephemera, Heliophila filicaulis, Heliophila leptophylla, Xiphotheca canescens, Xiphotheca cordifolia, Pterygodium vermiferum, Xiphotheca lanceolata, Argyrolobium velutinum, Acrolophia ustulata, Acrolophia bolusii, Melolobium stipulatum, Amphithalea flava, Amphithalea pageae, Amphithalea spinosa, Amphithalea virgata, Amphithalea bodkinii, Amphithalea bowiei, Amphithalea dahlgrenii, Amphithalea esterhuyseniae, Pterygodium cleistogamum, Disa lugens, Amphithalea speciosa, Amphithalea sericea, Anisodontea racemosa, Anisodontea biflora, Askidiosperma insigne, Nevillea singularis, Nevillea vlokii, Restio papyraceus, Willdenowia rugosa, Hoodia pilifera, Leobordea globulosa, Leobordea plicata, Cephalaria scabra, Duvalia elegans, Cynanchum zeyheri, Stapelia paniculata, Marsilea schelpeana, Quaqua framesii, Duvalia parviflora, Restio dodii, Restio duthieae, Restio cedarbergensis, Restio papillosus, Restio paludosus, Restio nuwebergensis, Restio aridus, Restio coactilis, Restio colliculospermus, Restio communis, Restio impolitus, Restio verrucosus, Restio scaber, Restio pulcher, Restio villosus, Erica filiformis, Erica fairii, Erica altiphila, Erica glumiflora, Erica granulatifolia, Erica grata, Erica galgebergensis, Erica amphigena, Erica gillii, Erica fontana, Erica amoena, Erica floccifera, Erica chloroloma, Erica chlorosepala, Erica glandulosa, Erica turneri, Erica euryphylla, Erica amidae, Erica eriophoros, Erica diosmifolia, Erica eburnea, Erica cyrilliflora, Erica cremea, Erica cygnea, Erica tragomontana, Erica jananthus, Erica perspicua, Erica capensis, Erica viscaria, Erica colorans, Erica binaria, Erica magnisylvae, Erica outeniquae, Erica velatiflora, Erica stokoeanthus, Erica caledonica, Erica vlokii, Erica filialis, Erica ignita, Erica abietina, Erica aristifolia, Erica venustiflora, Erica erina, Erica columnaris, Erica navigatoris, Erica garciae, Erica tarantulae, Erica montis-hominis, Erica calcareophila, Erica niveniana, Erica pilosiflora, Erica williamsiorum, Erica viscosissima, Erica brachialis, Oxalis burtoniae, Oxalis amblyosepala, Oxalis subsessilis, Oxalis suavis, Glottiphyllum linguiforme, Glottiphyllum salmii, Oxalis dines, Erica doliiformis, Erica purgatoriensis, Erica pycnantha, Erica lateriflora, Erica caprina, Erica alfredii, Erica albertyniae, Oxalis aurea, Oxalis meisneri, Pelargonium asarifolium, Pelargonium ovale, Pelargonium plurisectum, Pelargonium greytonense, Hermannia rugosa, Villarsia goldblattiana, Sebaea laxa, Sebaea rara, Eriospermum capense, Eriospermum crispum, Empleuridium juniperinum, Eriospermum rhizomatum, Stylapterus micranthus, Stylapterus sulcatus, Brachysiphon mundii, Endonema retzioides, Hermannia lavandulifolia, Hermannia muirii, Penaea dahlgrenii, Hereroa concava, Hermannia hispidula, Erica uysii, Erica vallis-gratiae, Erica urna-viridis, Erica turrisbabylonica, Erica xanthina, Erica wittebergensis, Erica rehmii, Erica podophylla, Erica praecox, Erica tetrathecoides, Erica stylaris, Erica sicifolia, Erica squarrosa, Erica atrovinosa, Erica paludicola, Erica oxysepala, Erica aspalathoides, Erica occulta, Erica pilulifera, Erica pauciovulata, Erica limosa, Erica madida, Erica junonia, Erica multiflexuosa, Erica nana, Erica nematophylla, Erica marifolia, Erica annectens, Erica hendricksei, Erica aneimena, Erica jacksoniana, Erica insolitanthera, Erica intricata, Erica inconstans, Limonium acuminatum, Liparia parva, Liparia rafnioides, Liparia laevigata, Indigofera magnifica, Indigofera triquetra, Salsola verdoorniae, Cliffortia incana, Liparia splendens, Cliffortia integerrima, Prunus africana, Liparia bonaespei, Cliffortia reniformis, Cliffortia cruciata, Cliffortia recurvata, Cliffortia scandens, Cliffortia alata, Cliffortia pilifera, Cliffortia phillipsii, Cliffortia nivenioides, Cliffortia viridis, Cliffortia tenuis, Cliffortia strigosa, Euchaetis tricarpellata, Euchaetis schlechteri, Euchaetis pungens, Cliffortia monophylla, Cliffortia longifolia, Cliffortia arborea, Macrostylis hirta, Coleonema pulchrum, Macrostylis crassifolia, Euchaetis intonsa, Euchaetis laevigata, Euchaetis avisylvana, Acmadenia rupicola, Acmadenia nivea, Acmadenia nivenii, Macrostylis ramulosa, Acmadenia latifolia, Acmadenia laxa, Acmadenia macropetala, Acmadenia alternifolia, Acmadenia faucitincta, Acmadenia fruticosa, Acmadenia gracilis, Aspalathus calcarea, Aspalathus campestris, Aspalathus candidula, Aspalathus calcarata, Aspalathus barbata, Aspalathus barbigera, Aspalathus borboniifolia, Aspalathus zeyheri, Ornithogalum perparvum, Daubenya zeyheri, Aspalathus capitata, Rhynchosia arida, Aspalathus taylorii, Aspalathus vulpina, Aspalathus acanthophylla, Aspalathus recurva, Aspalathus eriocephaloides, Aspalathus quartzicola, Aspalathus eustonbrownii, Aspalathus nickhelmei, Aspalathus arenaria, Aspalathus microlithica, Aspalathus steudeliana, Aspalathus sanguinea, Aspalathus pinea, Aspalathus pinguis, Aspalathus pallescens, Aspalathus oblongifolia, Aspalathus obtusata, Aspalathus obtusifolia, Aspalathus pycnantha, Aspalathus quadrata, Aspalathus acanthoclada, Aspalathus potbergensis, Aspalathus prostrata, Aspalathus araneosa, Aspalathus lanifera, Aspalathus latifolia, Aspalathus lebeckioides, Aspalathus lactea, Aspalathus hypnoides, Aspalathus millefolia, Aspalathus lotoides, Aspalathus acanthiloba, Aspalathus macrocarpa, Aspalathus longifolia, Aspalathus aculeata, Aspalathus chenopoda, Aspalathus chrysantha, Aspalathus globosa, Aspalathus glossoides, Aspalathus excelsa, Aspalathus florulenta, Aspalathus divaricata, Aspalathus cuspidata, Aspalathus digitifolia, Muraltia karroica, Muraltia lewisiae, Muraltia macropetala, Muraltia harveyana, Muraltia guthriei, Muraltia cyclolopha, Polygala pottebergensis, Polygala pubiflora, Muraltia spicata, Muraltia tenuifolia, Muraltia orbicularis, Muraltia pottebergensis, Sarcocornia decussata, Muraltia acerosa, Muraltia obovata, Muraltia comptonii, Muraltia calycina, Muraltia chamaepitys, Muraltia cliffortiifolia, Muraltia brevicornu, Muraltia brachypetala, Oedera garnotii, Athanasia scabra, Athanasia spathulata, Athanasia pectinata, Athanasia quinquedentata, Athanasia inopinata, Cotula duckittiae, Cotula eckloniana, Senecio lycopodioides, Oedera silicicola, Oedera steyniae, Cotula pusilla, Poecilolepis maritima, Anaxeton brevipes, Ursinia caledonica, Ursinia dregeana, Disparago barbata, Haplocarpha parvifolia, Steirodiscus tagetes, Thaminophyllum mundii, Felicia ebracteata, Felicia elongata, Felicia josephinae, Euryops namaquensis, Euryops tenuilobus, Euryops bertilii, Euryops hebecarpus, Berkheya angusta, Zyrphelis spathulata, Zyrphelis outeniquae, Berkheya carlinifolia, Zyrphelis glandulosa, Zyrphelis leiocarpa, Zyrphelis nervosa, Amphiglossa susannae, Amphiglossa corrudifolia, Agathosma trichocarpa, Euryops pectinatus, Psoralea alata, Agathosma thymifolia, Lasiopogon minutus, Heterolepis anomala, Polyarrhena reflexa, Metalasia octoflora, Metalasia oligocephala, Metalasia luteola, Metalasia alfredii, Metalasia bodkinii, Metalasia eburnea, Syncarpha lepidopodium, Metalasia tenuifolia, Metalasia tenuis, Metalasia umbelliformis, Metalasia rhoderoides, Metalasia seriphiifolia, Metalasia serrulata, Lachnaea capitata, Lachnaea rupestris, Lachnaea greytonensis, Lachnaea pusilla, Lachnaea oliverorum, Lachnaea leipoldtii, Lachnaea pendula, Lachnaea uniflora, Lachnaea aurea, Metalasia galpinii, Metalasia capitata, Lachnaea grandiflora, Passerina burchellii, Adenandra villosa, Adenandra multiflora, Adenandra odoratissima, Adenandra gummifera, Adenandra lasiantha, Agathosma sp. nov., Agathosma eriantha, Agathosma florida, Agathosma distans, Agathosma acocksii, Agathosma capitata, Agathosma hookeri, Agathosma pulchella, Agathosma riversdalensis, Agathosma muirii, Agathosma zwartbergense, Agathosma bicolor, Agathosma bodkinii, Agathosma serratifolia, Agathosma robusta, Agathosma rubricaulis, Diosma arenicola, Diosma thyrsophora, Diosma subulata, Diosma passerinoides, Diosma pilosa, Agathosma leptospermoides, Agathosma microcarpa, Agathosma lanceolata, Agathosma abrupta, Osmitopsis pinnatifida, Dimorphotheca walliana, Oncosiphon africanum, Heterorhachis aculeata, Cullumia squarrosa, Diosma demissa, Psoralea fascicularis, Psoralea vanberkelae, Arctotheca forbesiana, Psoralea angustifolia, Stoebe schultzii, Stoebe muirii, Chrysocoma strigosa, Amellus asteroides, Amellus capensis, Leucoptera nodosa, Helichrysum solitarium, Helichrysum bachmannii, Helichrysum dunense, Helichrysum incarnatum, Pteronia centauroides, Pteronia diosmifolia, Osteospermum calcicola, Osteospermum hafstroemii, Osteospermum hispidum, Osteospermum nordenstamii, Perdicium capense, Osteospermum pyrifolium, Osteospermum subulatum, Leucadendron singulare, Leucadendron procerum, Sorocephalus capitatus, Thamnea massoniana, Staavia brownii, Berzelia rubra, Berzelia burchellii, Berzelia cordifolia, Brunia sphaerocephala, Brunia latebracteata, Brunia callunoides, Brunia myrtoides, Asparagus exsertus, Peersia frithii, Skiatophytum skiatophytoides, Stayneria neilii, Colpoon speciosum, Audouinia esterhuyseniae, Berzelia incurva, Asparagus mollis, Leucadendron argenteum, Lachnostylis hanekomii, Merciera tenuifolia, Rhigiophyllum squarrosum, Leucadendron cinereum, Leucadendron concavum, Leucadendron burchellii, Polhillia pallens, Rafnia vlokii, Otholobium rotundifolium, Otholobium sabulosum, Otholobium spissum, Otholobium dreweae, Otholobium lucens, Polhillia canescens, Otholobium venustum, Phylica dioica, Phylica cuspidata, Phylica cylindrica, Phylica agathosmoides, Phylica confusa, Phylica brachycephala, Phylica brevifolia, Phylica calcarata, Caesia sabulosa, Walleria gracilis, Cyanella alba, Phylica harveyi, Phylica hirta, Phylica floribunda, Phylica pauciflora, Phylica plumosa, Phylica lucida, Phylica ampliata, Triglochin bulbosa, Phylica incurvata, Wurmbea inusta, Wurmbea capensis, Wurmbea compacta, Phylica strigulosa, Phylica subulifolia, Phylica stenopetala, Phylica stenantha, Wurmbea hiemalis, Dianthus basuticus, Blepharis inermis, Ruellia pilosa, Silene ornata, Lachenalia longibracteata, Lachenalia haarlemensis, Lachenalia magentea, Jacobsenia hallii, Lotononis dahlgrenii, Lotononis densa, Lotononis rigida, Lotononis involucrata, Lotononis nutans, Lotononis argentea, Amauropelta knysnaensis, Stirtonanthus taylorianus, Podalyria orbicularis, Podalyria pearsonii, Podalyria sericea, Podalyria cordata, Leucospermum grandiflorum, Leucospermum heterophyllum, Leucospermum parile, Leucospermum mundii, Leucospermum muirii, Leucadendron discolor, Leucospermum catherinae, Leucadendron olens, Protea scorzonerifolia, Protea scolymocephala, Protea scabra, Protea aurea, Protea denticulata, Protea cryophila, Protea convexa, Protea caespitosa, Protea burchellii, Leucospermum saxatile, Leucospermum praecox, Leucospermum profugum, Protea aspera, Protea restionifolia, Protea aristata, Leucospermum bolusii, Leucospermum vestitum, Paranomus spicatus, Protea montana, Mimetes hirtus, Mimetes chrysanthus, Mimetes capitulatus, Mimetes hottentoticus, Protea lacticolor, Protea angustata, Serruria rubricaulis, Serruria rostellaris, Serruria kraussii, Serruria hirsuta, Roella arenaria, Roella uncinata, Wahlenbergia microphylla, Wahlenbergia polyantha, Prismatocarpus pauciflorus, Roella decurrens, Roella goodiana, Prismatocarpus decurrens, Pachypodium succulentum, Stilbe serrulata, Euthystachys abbreviata, Thesmophora scopulosa, Wahlenbergia subulata, Wahlenbergia umbellata, Lampranthus ceriseus, Lampranthus curvifolius, Lampranthus filicaulis, Lampranthus fergusoniae, Lampranthus spiniformis, Lampranthus procumbens, Lampranthus stenopetalus, Lampranthus peacockiae, Lampranthus acrosepalus, Lampranthus holensis, Lampranthus aureus, Serruria viridifolia, Orothamnus zeyheri, Serruria triternata, Serruria stellata, Serruria gracilis, Spatalla thyrsiflora, Spatalla propinqua, Spatalla mollis, Spatalla nubicola, Serruria flagellifolia, Serruria cyanoides, Serruria candicans, Roepera fuscata, Gladiolus trichonemifolius, Ixia purpureorosea, Ixia patens, Ixia vanzijliae, Ixia abbreviata, Aloiampelos commixta, Aloiampelos decumbens, Thereianthus montanus, Freesia fergusoniae, Ixia recondita, Ixia tenuis, Ixia oxalidiflora, Ixia dolichosiphon, Ixia mollis, Ixia parva, Ixia superba, Syringodea derustensis, Freesia speciosa, Syringodea saxatilis, Freesia leichtlinii, Freesia praecox, Sparaxis calcicola, Sparaxis caryophyllacea, Sparaxis parviflora, Sparaxis grandiflora, Geissorhiza monanthos, Geissorhiza humilis, Geissorhiza silenoides, Geissorhiza arenicola, Lobelia valida, Lobelia ardisiandroides, Cyphia oligotricha, Drosanthemum pulchrum, Cyphia campestris, Drosanthemum pulchellum, Cephalophyllum pulchellum, Cephalophyllum pulchrum, Oscularia vredenburgensis, Drosanthemum striatum, Drosanthemum hispifolium, Salvia thermarum, Machairophyllum brevifolium, Drosanthemum austricola, Ruschia diversifolia, Ruschia duthiae, Trichodiadema occidentale, Trichodiadema burgeri, Drosanthemum giffenii, Ruschia geminiflora, Ruschia incurvata, Pauridia alba, Ruschia strubeniae, Ruschia bipapillata, Ruschia rubricaulis, Ruschia langebaanensis, Ruschia beaufortensis, Micranthus thereianthoides, Ferraria brevifolia, Ferraria densepunctulata, Pauridia linearis, Lapeirousia simulans, Drosanthemum anomalum, Watsonia fergusoniae, Moraea villosa, Romulea toximontana, Romulea vlokii, Romulea lilacina, Romulea albomarginata, Bobartia longicyma, Romulea sladenii, Romulea stellata, Romulea sulphurea, Romulea jugicola, Romulea membranacea, Romulea multisulcata, Romulea quartzicola, Erepsia ramosa, Erepsia pillansii, Erepsia patula, Phiambolia littlewoodii, Psydrax capensis, Erepsia babiloniae, Geissorhiza brevituba, Ehrharta setacea, Delosperma mariae, Spetaea lachenaliiflora, Erepsia oxysepala, Nivenia concinna, Nivenia dispar, Acrodon deminutus, Bijlia tugwelliae, Tribolium ciliare, Pentameris longiglumis, Pentameris trifida, Antimima peersii, Disphyma dunsdonii, Antimima hamatilis, Antimima koekenaapensis, Antimima komkansica, Antimima leipoldtii, Antimima mucronata, Helictotrichon rogerellisii, Antimima fenestrata, Pentameris calcicola* |
